# Supplementary material for: Photocatalytic activity of BiFeO3/ZnFe2O4 nanocomposites under visible light irradiation
Source: Royal Society of Chemistry journal article supplement (doi:10.1039/c7ra13380d), 2018-01-01
Supplement: c7ra13380d1.pdf [file c7ra13380d1.pdf]

## Supporting information for Photocatalytic activity of ZnFe<sub>2</sub>O<sub>4</sub>/BiFeO<sub>3</sub> nanocomposites under visible light irradiation

B. Safizadeh, S.M. Masoudpanah\*, M. Hasheminasari, A. Ghasemi

*School of Metallurgy & Materials Engineering, Iran University of Science and Technology (IUST), Tehran, Iran*

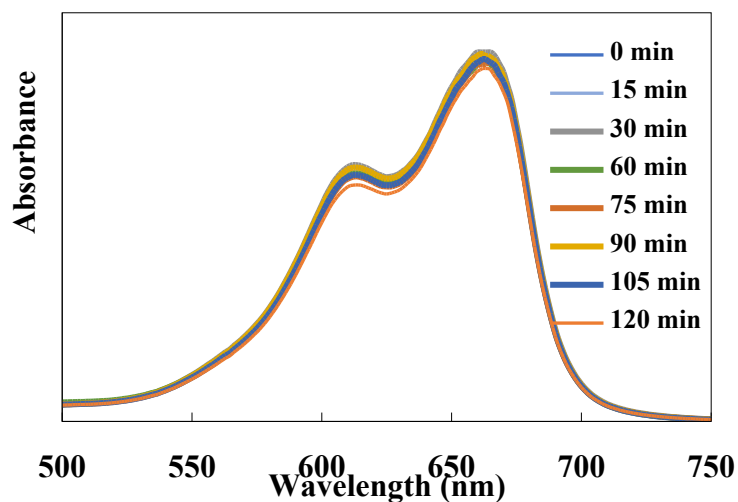

Fig. 1S. UV-Vis spectra of MB after different irradiation times using BiFeO<sub>3</sub>-25 wt.% ZnFe<sub>2</sub>O<sub>4</sub> catalyst at pH of 7.

---

\* Corresponding author: e-mail: masoodpanah@iust.ac.ir, Phone: +98 21 77240540, Fax: +98 21 77240480

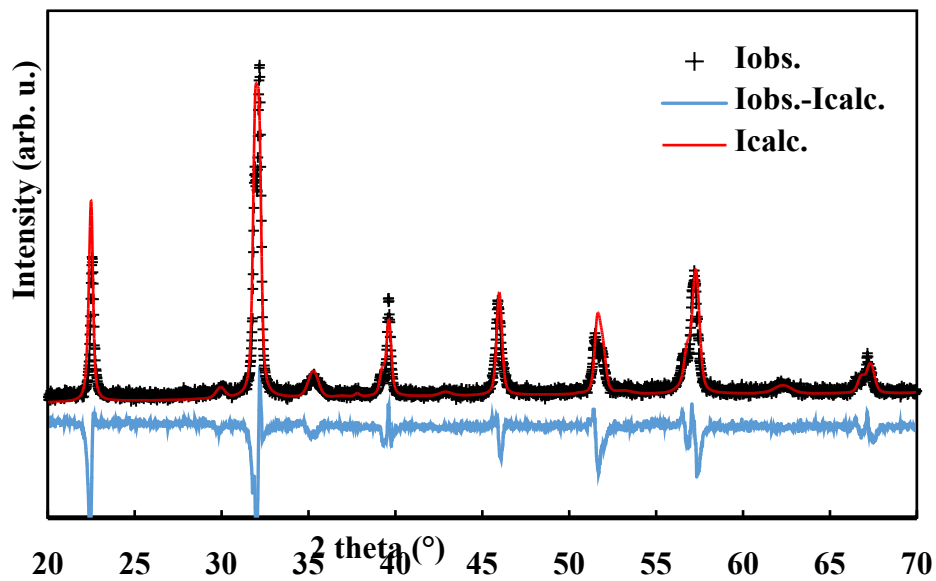

Fig. 2S. XRD pattern and Rietveld results for BiFeO<sub>3</sub>-25 wt. %ZnFe<sub>2</sub>O<sub>4</sub> composite. The fitting qualities, R<sub>b</sub>, R<sub>wp</sub>, and  $\chi^2$  are 8.1%, 5.5%, and 1.34, respectively.
